# Supplementary material
Source: Springer Nature journal article supplement (https://www.springermedizin.de/resource/supplementary/12967_2008_335_MOESM4_ESM.pdf/9576250)

Without Chemo Tx.

with 50nM Gemcitabine

with 50nM Paclitaxel

SV119  
0uM

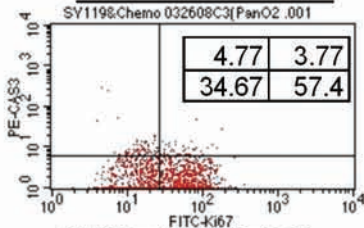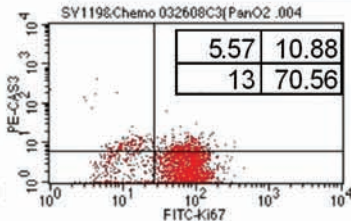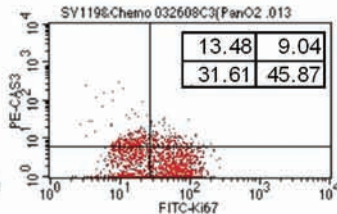

SV119  
10uM

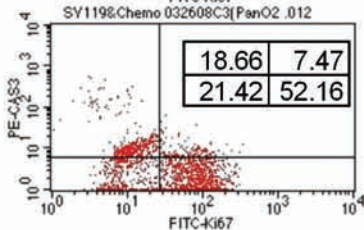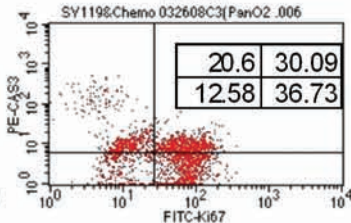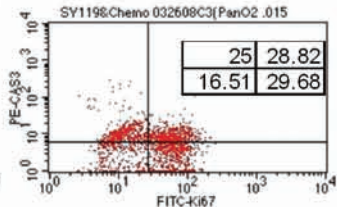

Supplement: MOESM4 [file 9576250]
